# Supplementary material for: Size dependence of CdS nanoparticles on the precursor concentration and visible light driven photocatalytic degradation of methylene blue
Source: Royal Society of Chemistry journal article supplement (doi:10.1039/d1nj01588e), 2021-01-01

# New Journal of Chemistry

## ELECTRONIC SUPPLEMENTARY INFORMATION

### **Size dependence of CdS nanoparticles on the precursor concentration and visible light driven photocatalytic degradation of methylene blue**

Smriti Thakur, Rupinder Kaur and Sanjay K Mandal\*

Department of Chemical Sciences, Indian Institute of Science Education and Research Mohali,  
Sector 81, Manauli PO, S.A.S. Nagar, Mohali, Punjab 140306, India,

\*[sanjaymandal@iisermohali.ac.in](mailto:sanjaymandal@iisermohali.ac.in)

## Table of Contents

| <b>Figures/Tables</b> | <b>Description</b>                                                                                                             | <b>Page No.</b> |
|-----------------------|--------------------------------------------------------------------------------------------------------------------------------|-----------------|
| Figures S1-S6         | EDX spectra and elemental mapping of CdS nanoparticles                                                                         | S3-S5           |
| Figures S7-S8         | PXRD patterns of <b>CdS-1</b> and <b>CdS-4</b> after BET surface area analysis and <b>CdS-1</b> recovered after photocatalysis | S6              |
| Table S1              | Comparison of rate constants of CdS nanoparticles                                                                              | S7              |
| Scheme S1             | Reactions involved on the surface of CdS catalyst                                                                              | S8              |

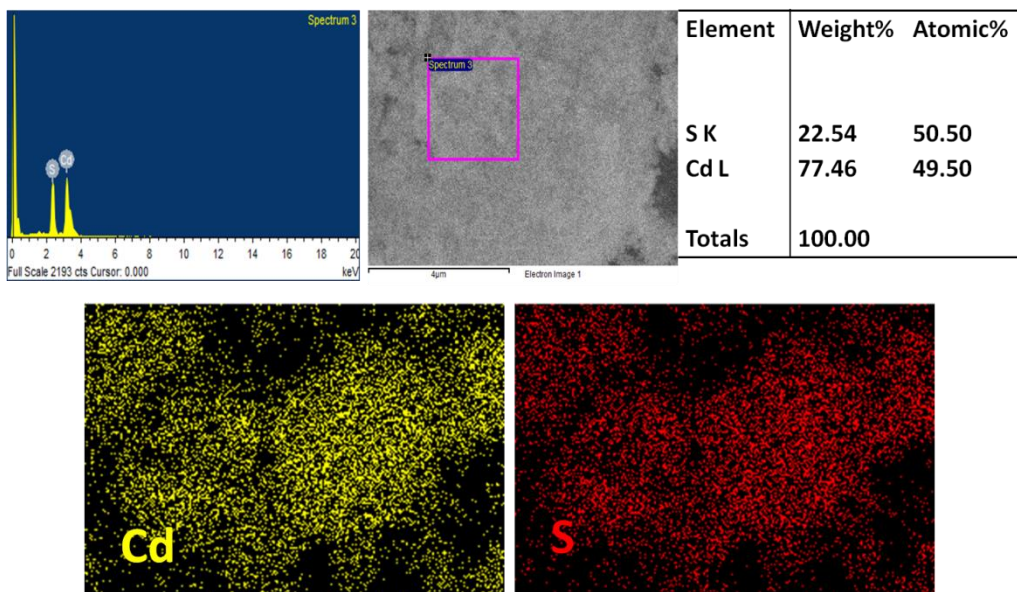

**Fig. S1** EDX spectrum and elemental mapping of CdS-1.

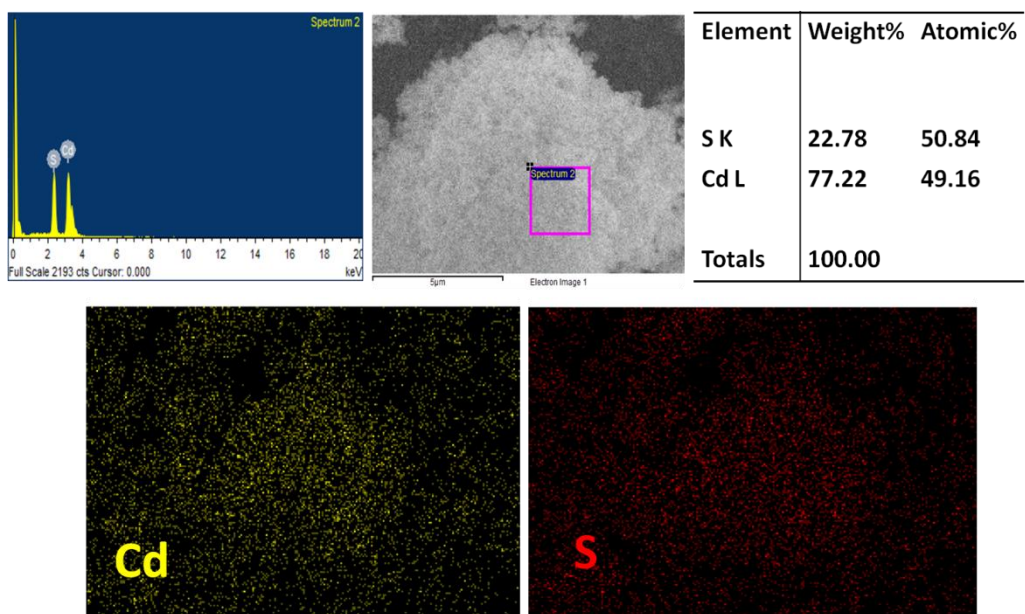

**Fig. S2** EDX spectrum and elemental mapping of CdS-2.

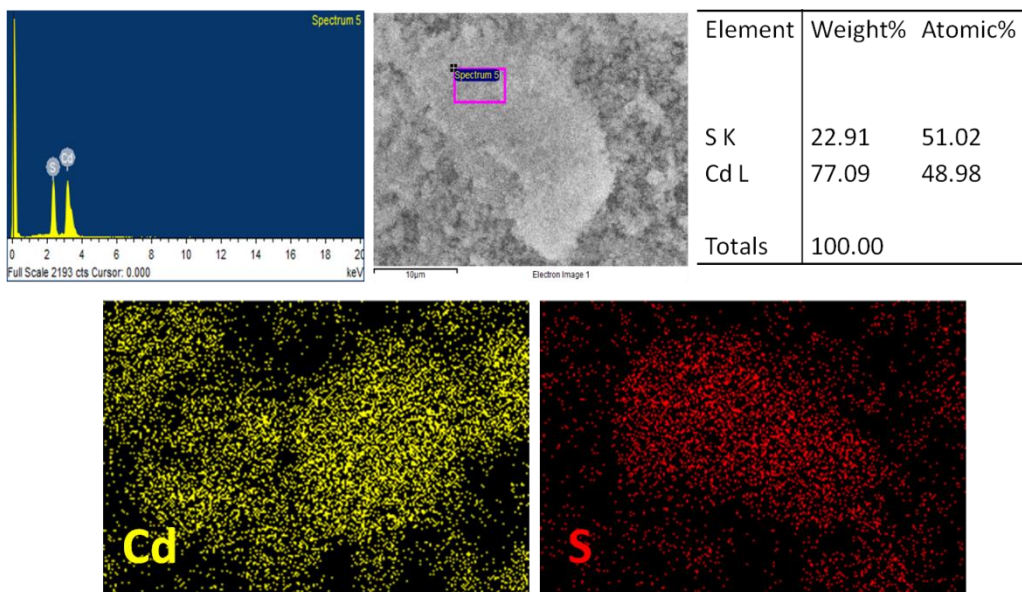

**Fig. S3** EDX spectrum and elemental mapping of **CdS-3**.

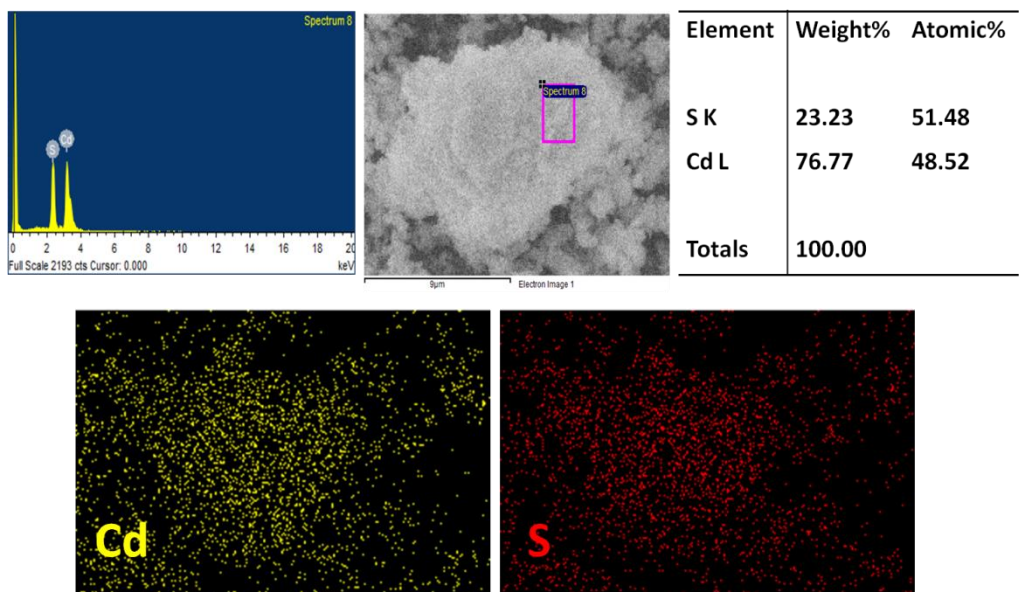

**Fig. S4** EDX spectrum and elemental mapping of **CdS-4**.

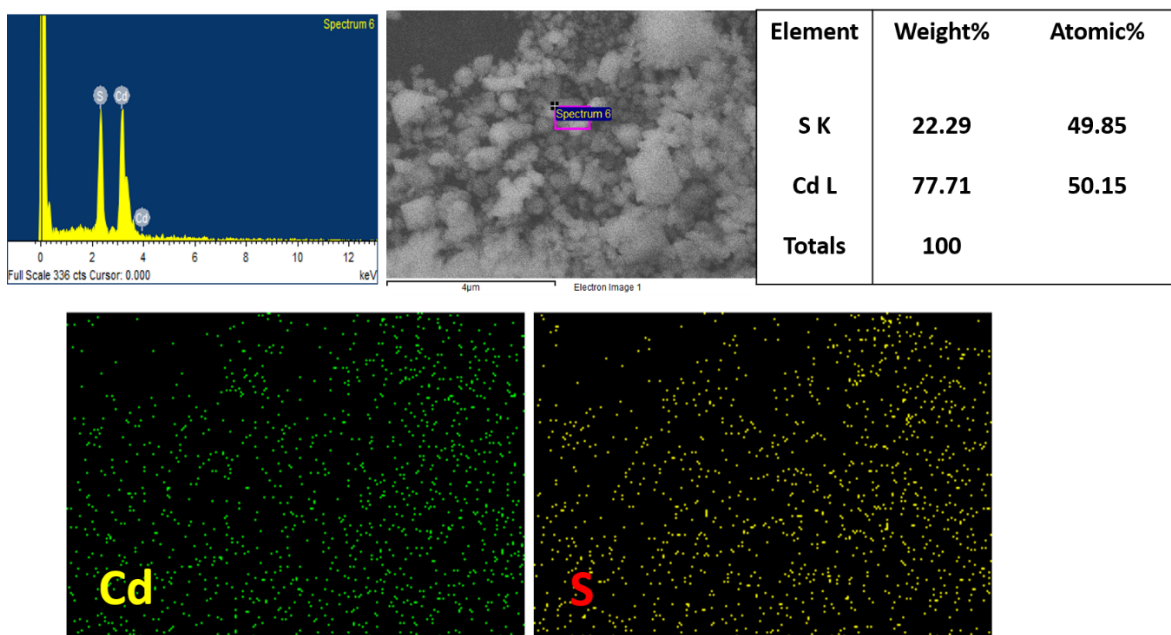

**Fig. S5** EDX spectrum and elemental mapping of **CdS-5**.

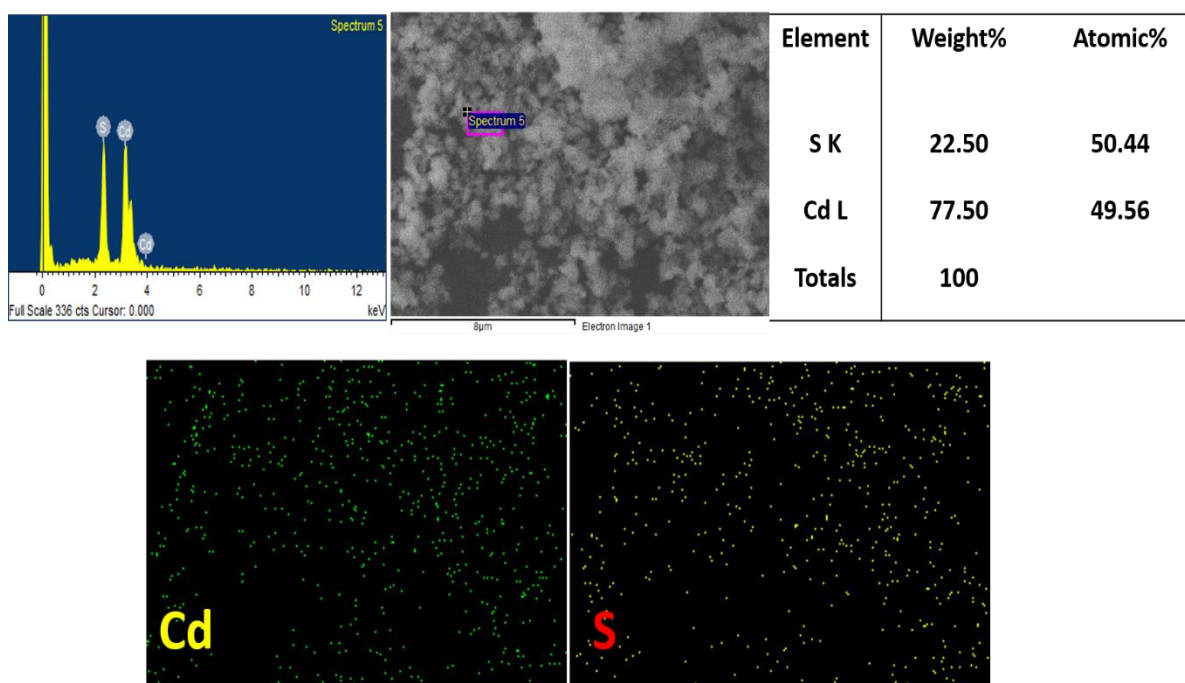

**Fig. S6** EDX spectrum and elemental mapping of **CdS-6**.

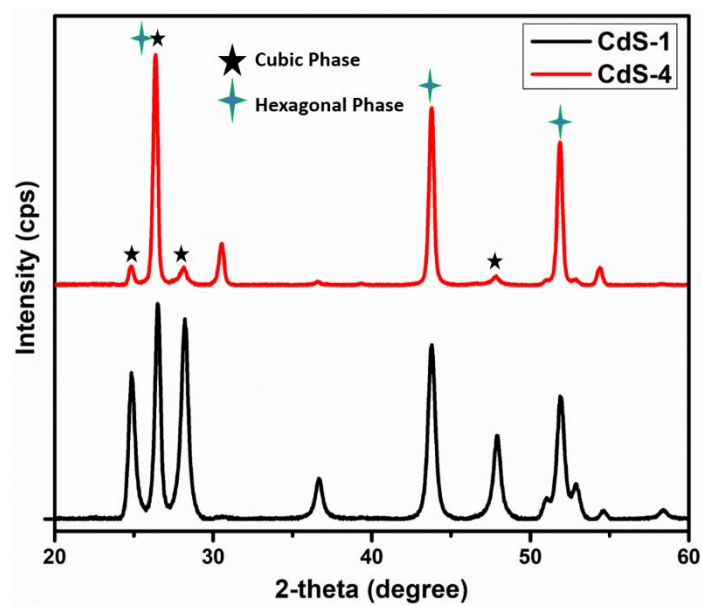

Fig. S7 PXR D patterns of CdS-1 and CdS-4 after the BET surface area analysis.

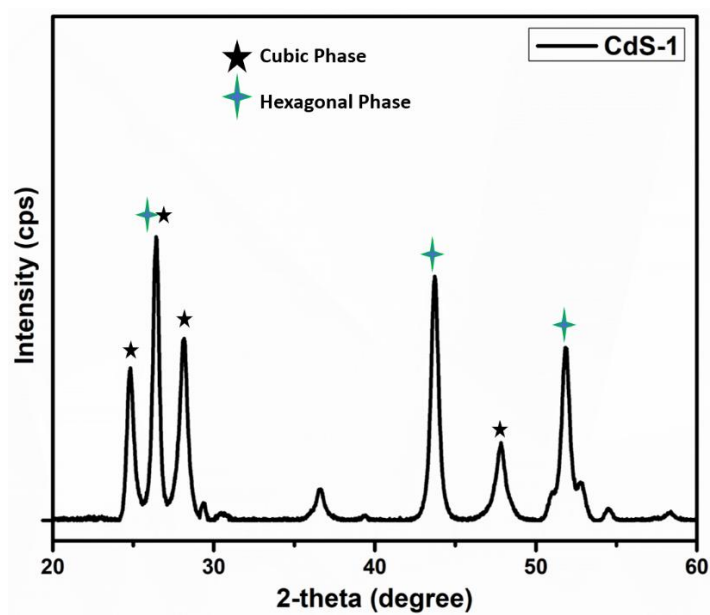

Fig. S8 PXR D pattern of CdS-1 recovered after photocatalysis.

**Table S1.** Comparison of rate constants of CdS nanoparticles (**CdS-1** to **CdS-4**) with literature values.

| <b>Morphology</b>                 | <b>Rate constant<br/>(min<sup>-1</sup>)</b> | <b>Time</b> | <b>Reference</b> |
|-----------------------------------|---------------------------------------------|-------------|------------------|
| <b>Agglomerated Nanoparticles</b> | 1.57x10 <sup>-2</sup>                       | 120 min     | 46               |
| <b>PVP Capped Nanoparticles</b>   | 0.29x10 <sup>-2</sup>                       | 360 min     | 47               |
| <b>Hollow microspheres</b>        | 1.09x10 <sup>-2</sup>                       | 210 min     | 48, 49           |
| <b>Nanospheres</b>                | 1.03x10 <sup>-2</sup>                       | 90 min      | 50               |
| <b>Nanospheres</b>                | 1.78x10 <sup>-2</sup>                       | 180 min     | 51               |
| <b>Nanoparticles</b>              | 1.2x10 <sup>-2</sup>                        | 90 min      | 52               |
| <b>Nanoparticles</b>              | 0.4x10 <sup>-2</sup>                        | 140 min     | 53               |
| <b>CdS-1</b>                      | 1.79x10 <sup>-2</sup>                       | 180 min     | <i>This work</i> |
| <b>CdS-2</b>                      | 1.05x10 <sup>-2</sup>                       | 180 min     | <i>This work</i> |
| <b>CdS-3</b>                      | 0.77x10 <sup>-2</sup>                       | 180 min     | <i>This work</i> |
| <b>CdS-4</b>                      | 0.74x10 <sup>-2</sup>                       | 180 min     | <i>This work</i> |

**Scheme S1.** Reactions involved on the surface of CdS catalyst.

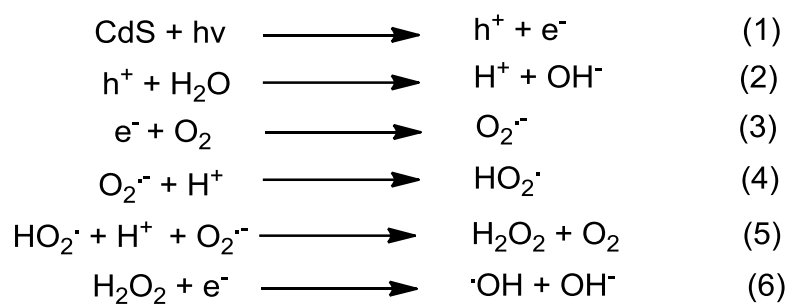

Supplement: d1nj01588e1.pdf [file d1nj01588e1.pdf]
